# Supplementary material for: The Finnish Canine Stifle Index: responsiveness to change and intertester reliability
Source: PubMed Central journal article supplement — Vet Rec. 2020 Jun 11;186(18):604. doi: 10.1136/vr.105030 (PMC7365560; doi:10.1136/vr.105030), 2020-06-11
Supplement: vetrec-2018-105030supp001.pdf [file vetrec-2018-105030supp001.pdf]

## Appendix 1.

### Breeds included in the study.

Group of dogs with any stifle dysfunction, included the following breeds: 2 Bichon Havannaises, 2 Golden Retrievers, 2 Jack Russel Terriers, and one of each following; Afghan Hound, American Akita, American Staffordshire Terrier, Bernese Mountain Dog, Border Collie, Boxer, Griffon Bruxellois, Finnish Lapphund, French Bulldog, German Wirehaired Pointer, Glenn of Imaal terrier, Kleinspitz, Lagotto Romagnolo, Norfolk Terrier, Miniature Poodle, Mixed breed dog, Parson Russel Terrier, Petit Brabancon, Portuguese Podengo, Russian Toy Terrier, Samoyed and Short Haired Chihuahua.

Group of dogs with some musculoskeletal disease other than stifle dysfunction, included the following breeds: 3 Border Collies, 2 Labrador Retrievers, 3 Mixed breed dogs, and one of each following; Australian Shepherd, Doberman, Cavalier King Charles Spaniel, Norwich Terrier, Nova Scotia Duck Tolling Retriever, Pumi, Spanish Water Dog, and Staffordshire Bull Terrier.

Group of control dogs with no known musculoskeletal disease, included the following breeds: 2 Border Collies, 2 Mixed breed dogs, and one of each following; Chinese Crested Dog, Cocker Spaniel, Golden Retriever, Lapponian Herder, Mudi, Polish Hound, and Rough Collie.
